# Supplementary material for: High-performance polymer solar cells based on a 2D-conjugated polymer with an alkylthio side-chain
Source: Royal Society of Chemistry journal article supplement (doi:10.1039/c5ee03684d), 2016-01-01
Supplement: c5ee03684d1.pdf [file c5ee03684d1.pdf]

## **High-Performance Polymer Solar Cells based on a 2D-Conjugated Polymer with Alkylthio Side-Chain**

Chaohua Cui<sup>1, 2</sup>, Zhicai He<sup>3\*</sup>, Yue Wu<sup>1</sup>, Xiao Cheng<sup>1</sup>, Hongbin Wu<sup>3</sup>, Yongfang Li<sup>1, 4\*</sup>,  
Yong Cao<sup>3</sup>, Wai-Yeung Wong<sup>2\*</sup>

1. Laboratory of Advanced Optoelectronic Materials, College of Chemistry, Chemical Engineering and Materials Science, Soochow University, Suzhou 215123, China. E-mail: liyongfang@suda.edu.cn (Y. Li)

2. Institute of Molecular Functional Materials, Department of Chemistry and Institute of Advanced Materials, Hong Kong Baptist University, Waterloo Road, Hong Kong, P. R. China. E-mail: rwywong@hkbu.edu.hk (W.-Y. Wong)

3. Institute of Polymer Optoelectronic Materials and Devices, State Key Laboratory of Luminescent Materials and Devices, South China University of Technology, Guangzhou 510640, China. E-mail: zhicaihe@scut.edu.cn (Z. He)

4. Beijing National Laboratory of Molecular Sciences, CAS Key Laboratory of Organic Solids, Institute of Chemistry, Chinese Academy of Sciences, Beijing 100190, P. R. China. E-mail: liyf@iccas.ac.cn (Y. Li)

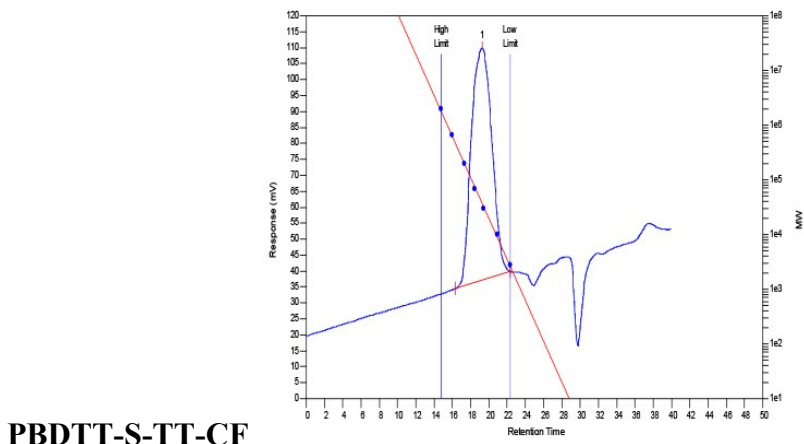

**PBDTT-S-TT-CF**

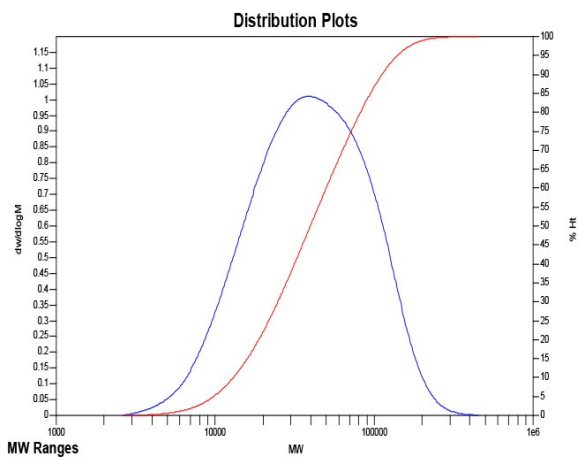

**PBDTT-O-TT-CF**

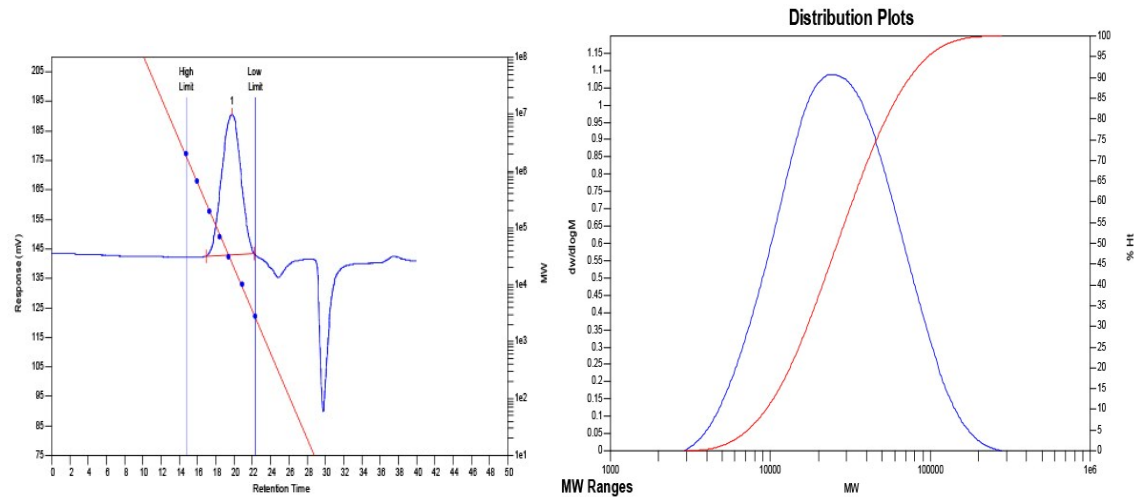

**Figure S1.** High temperature gel permeation chromatography (GPC) trace of polymers. The molecular weight was measured with 1, 2, 4-trichlorobenzene as eluent at 160 °C.

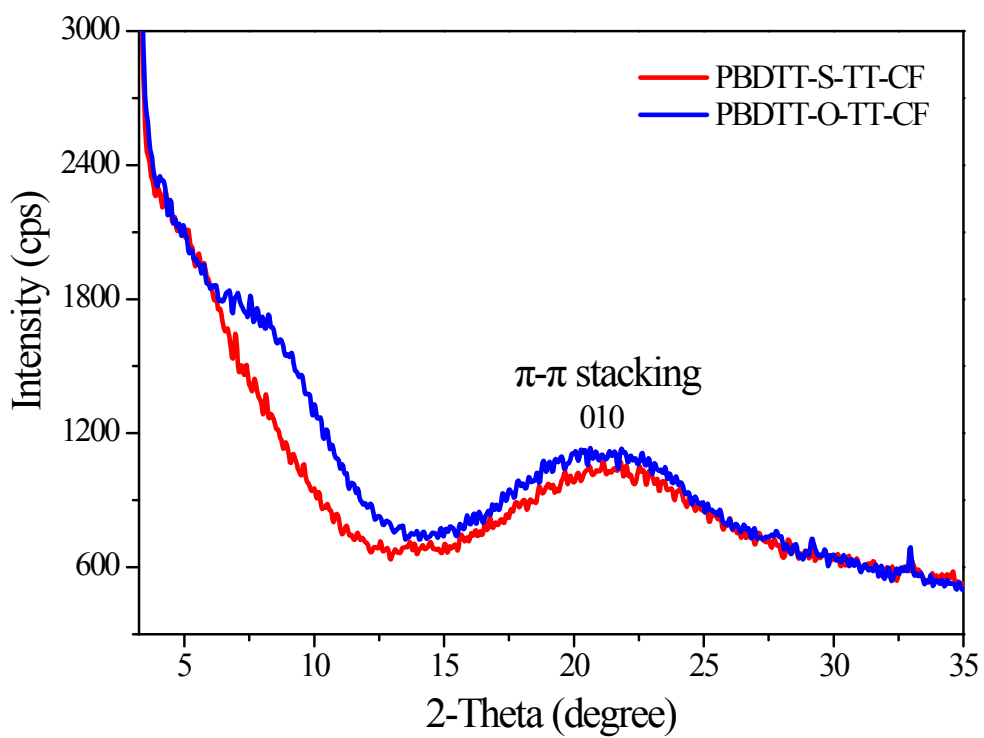

**Figure S2.** XRD pattern of **PBDTT-S-TT-CF** and **PBDTT-O-TT-CF** films
